# Supplementary material for: Karyotype Variability in Wild Narcissus poeticus L. Populations from Different Environmental Conditions in the Dinaric Alps
Source: MDPI journal article supplement (doi:10.3390/plants13020208), 2024-01-11
Supplement: s1 [file s1]

**Table S1.** Mean values of morphometric data for the standard haploid karyotype of *Narcissus poeticus* from 13 populations studied.

| Chromosome pair                   | 1               | 2               | 3               | 4               | 5                | 6               | 7               | I               | II              | III             |
|-----------------------------------|-----------------|-----------------|-----------------|-----------------|------------------|-----------------|-----------------|-----------------|-----------------|-----------------|
| L ( $\mu\text{m}\pm\text{sd}$ )   | 6.49 $\pm$ 0.27 | 6.09 $\pm$ 0.23 | 5.95 $\pm$ 0.17 | 5.61 $\pm$ 0.39 | 4.42 $\pm$ 0.235 | 5.89 $\pm$ 0.19 | 3.15 $\pm$ 0.19 | 2.49 $\pm$ 0.59 | 1.89 $\pm$ 0.13 | 2.86 $\pm$ 0.21 |
| S ( $\mu\text{m}\pm\text{sd}$ )   | 2.82 $\pm$ 0.31 | 2.78 $\pm$ 0.19 | 2.35 $\pm$ 0.24 | 2.69 $\pm$ 0.18 | 3.21 $\pm$ 0.27  | 1.64 $\pm$ 0.18 | 1.87 $\pm$ 0.47 | 1.05 $\pm$ 0.49 | 1.78 $\pm$ 0.19 | 0.48 $\pm$ 0.12 |
| TLC ( $\mu\text{m}\pm\text{sd}$ ) | 9.31 $\pm$ 0.36 | 8.87 $\pm$ 0.25 | 8.30 $\pm$ 0.16 | 8.30 $\pm$ 0.31 | 7.63 $\pm$ 0.28  | 7.53 $\pm$ 0.12 | 5.02 $\pm$ 0.21 | 3.54 $\pm$ 0.30 | 3.67 $\pm$ 0.07 | 3.34 $\pm$ 0.11 |
| r                                 | 2.30            | 2.19            | 2.53            | 2.09            | 1.38             | 3.59            | 1.68            | 2.37            | 1.06            | 6.00            |
| Ci                                | 30.29           | 31.34           | 28.31           | 32.41           | 42.07            | 21.78           | 37.25           |                 |                 |                 |
| CT                                | sm              | sm              | sm              | sm              | m                | st              | m               | sm              | m               | st              |
| $\Sigma\text{TLC}$                | 54.96           |                 |                 |                 |                  |                 |                 |                 |                 |                 |
| AsI                               | 67.05           |                 |                 |                 |                  |                 |                 |                 |                 |                 |
| R                                 | 1.85            |                 |                 |                 |                  |                 |                 |                 |                 |                 |

L, long arm; S, short arm; TLC, total chromosome length (TLC = L+S); r, arm ratio ( $r = L/S$ ); Ci, centromeric index [ $\text{Ci} = 100 \times S/(L+S)$ ]; CT, chromosome type [m-metacentric, sm-submetacentric, st-subtelocentric; according to Levan et al. [63]];  $\Sigma\text{TLC}$ , total chromosome lengths for haploid karyotype; AsI, asymmetric index /AsI % =  $(\Sigma L / \Sigma TL) \times 100$ ; according to Arano and Saito [64]; R, ratio longest/shortest chromosome pair; sd, standard deviation; I,II,III, B chromosome types.
