# Supplementary material for: Karyotype Variability in Wild Narcissus poeticus L. Populations from Different Environmental Conditions in the Dinaric Alps
Source: MDPI journal article supplement (doi:10.3390/plants13020208), 2024-01-11
Supplement: s1 [file s1]

## Supplementary Materials

**Figure S1:** The activity of the rRNA genes on B chromosomes in *Narcissus poeticus*. (A) Silver staining of the nucleoli of an individual with 1B chromosome. Scale bar on photo = 5  $\mu\text{m}$ . (B) Confirmation of activity of 35S rRNA genes (red fluorescence) in the representative interphase nucleus after FISH with 1B chromosome (white arrows mark their positions on A and B chromosomes). Scale bar on photo = 5  $\mu\text{m}$ .

**Figure S2:** Results of chromomycin banding and FISH of *Narcissus poeticus* individuals with chromosomal rearrangements. (A1) CMA, (A2) FISH and (A3) idiogram of an individual from the serpentine population (pop 12) with inversion on pair 4 (arrows, boxed). (B1) and (C1) CMA, (B2) and (C2) FISH, and (B3) and (C3) idiograms of two individuals showing the translocations in the serpentine (B; pop 12) and limestone (C; pop 2; unpaired chromosomes boxed) populations. Scale bar on photos = 5  $\mu\text{m}$ .

**Figure S3:** 2C cytometric histogram of *N. poeticus* with *Artemisia arborescens* as internal standard.

**Table S1:** Mean values of morphometric data for the standard haploid karyotype of *Narcissus poeticus* from 13 populations studied. L, long arm; S, short arm; TLC, total chromosome length ( $\text{TLC} = \text{L} + \text{S}$ ); r, arm ratio ( $r = \text{L}/\text{S}$ ); Ci, centromeric index [ $\text{Ci} = 100 \times \text{S}/(\text{L} + \text{S})$ ]; CT, chromosome type (m–metacentric, sm–submetacentric, st–subtelocentric; according to Levan et al. [63]);  $\Sigma\text{TLC}$ , total chromosome lengths for haploid karyotype; AsI, asymmetry index ( $\text{AsI} \% = (\Sigma\text{L} / \Sigma\text{TL}) \times 100$ ; according to Arano and Saito [64]); R, ratio longest/shortest chromosome pair; sd, standard deviation; I,II,III, B chromosome types.
