# Supplementary material for: Karyotype Variability in Wild Narcissus poeticus L. Populations from Different Environmental Conditions in the Dinaric Alps
Source: Plants (Basel). 2024 Jan 11;13(2):208. doi: 10.3390/plants13020208 (PMC10818684; doi:10.3390/plants13020208)
Supplement: Supplementary file 1 [file plants-13-00208-s001.zip]

Archive with 5 entries (5 files):
- Figure S1.tif
- Figure S2.tif
- Figure S3.tif
- Supplementary captions.pdf
- Table S1.pdf
